# Supplementary material for: Quantitative single-particle profiling of extracellular vesicles via fluorescent nanoparticle tracking analysis
Source: Royal Society of Chemistry journal article supplement (doi:10.1039/d5sd00119f), 2025-12-03
Supplement: d5sd00119f1.pdf [file d5sd00119f1.pdf]

## Supplementary Information

### Quantitative Single-particle Profiling of Extracellular Vesicles via Fluorescent Nanoparticle Tracking Analysis

Yiting Liu<sup>a</sup>, Anthony James El-helou<sup>a</sup>, Bill Söderström<sup>b</sup>, Juanfang Ruan<sup>c</sup> and Ying Zhu<sup>\*a,d,e,f</sup>

<sup>a</sup> School of Biomedical Engineering, University of Technology Sydney, Australia

<sup>b</sup> Australian Institute for Microbiology and Infection, University of Technology Sydney, Australia

<sup>c</sup> Electron Microscope Unit, UNSW Sydney, Australia

<sup>d</sup> School of Clinical Medicine, Faculty of Medicine & Health, UNSW Sydney, Australia

<sup>e</sup> Institute for Biomedical Materials and Devices, University of Technology Sydney, Australia

<sup>f</sup> Australian Centre for NanoMedicine, UNSW Sydney, Australia

Table S1: Antibodies information used in this study. All antibodies' clonality is monoclonal.

| Target | Vendor                   | Cat No.   | Clone        | Host/Isotype | Lot No.   |
|--------|--------------------------|-----------|--------------|--------------|-----------|
| CD63   | Thermo Fisher Scientific | MA5-18149 | MEM-259      | Mouse/ IgG1  | YH4015363 |
| CD63   | Abcam                    | ab309976  | EPR5702      | Rabbit/ IgG  | 1054788-1 |
| ApoB   | Santa Cruz               | sc-393636 | A-6          | Mouse/ IgG1  | K1618     |
| EpCAM  | Abcam                    | ab237395  | EPR20532-225 | Rabbit/ IgG  | 1085103-6 |

Table S2: List of reagents used in this study.

| Reagent                              | Company         | Cat No.     | Purpose                      |
|--------------------------------------|-----------------|-------------|------------------------------|
| Non-PEGylated biotinylated liposomes | CD Bioparticles | CDEIMS-1523 | Liposomes binding validation |
| DiO-labelled liposomes               | CD Bioparticles | CDL6001F-DO | Fluorescence standards       |
| DiD-labelled liposomes               | CD Bioparticles | CDL6001F-DD | Fluorescence standards       |

|                                  |                    |                  |                                  |
|----------------------------------|--------------------|------------------|----------------------------------|
| Lyophilised exosomes from HT29   | HansaBiomed        | HBM-HT29-100/2   | Cell line extracellular vesicles |
| Lyophilised exosomes from HEK293 | HansaBiomed        | HBM-HEK293-100/2 | Cell line extracellular vesicles |
| Very low-density lipoprotein     | Merck Life Science | 437647-5MG       | Lipoprotein binding validation   |
| Phosphate-buffered saline        | Sigma-Aldrich      | P4417            | Buffer                           |
| Poly-L-lysine solution           | Sigma-Aldrich      | P8920            | Coverslip coating                |
| Polystyrene 100 nm beads         | Particle Metrix    | —                | Calibration                      |

### Cryogenic Electron Microscopy (Cryo-EM)

Cryo-EM was used to determine the morphologies of EV samples. 4  $\mu$ L EV isolates were applied to glow-discharged copper grids (Quantifoil R2/2, Quantifoil Micro Tools). The grids were blotted for 4.5 s at 4 °C with 100% humidity and plunged into liquid ethane using a Vitrobot Mark IV device (Thermo Fisher Scientific, Waltham, MA, USA). The vitrified samples were stored in liquid nitrogen (-196 °C) prior to cryo-TEM analysis. Cryo-EM data were collected on a Thermo Fisher Talos Arctica transmission electron microscope operated at 200 kV acceleration voltage. Images were recorded on a Falcon III detector (Thermo Fisher Scientific, Waltham, MA, USA).

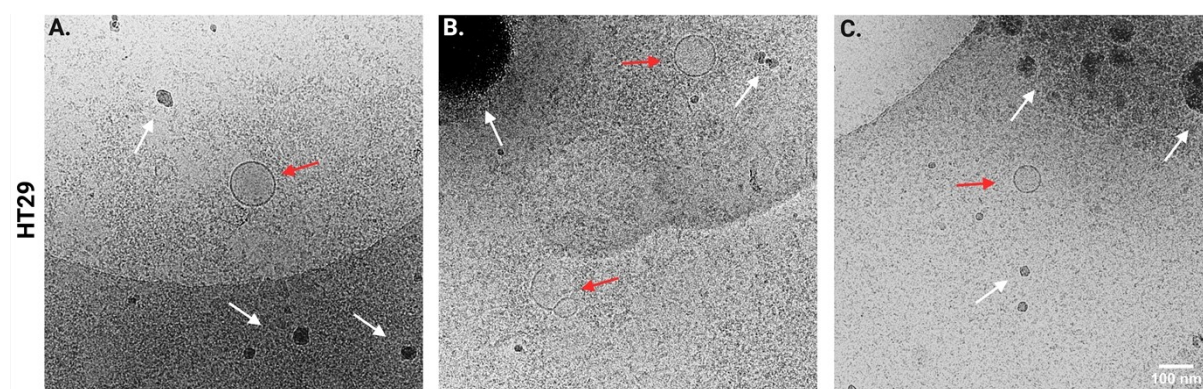

Figure S1. Representative Cryo-EM images of the commercially pursued HT29 EVs, showing the presence of EVs (red arrow) and other impurities (white arrow). Scale bar: 100 nm.

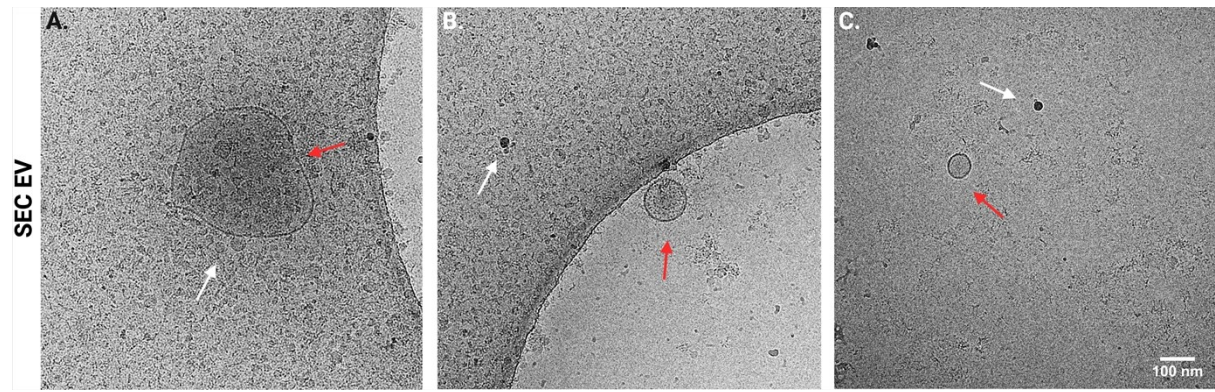

Figure S2. Representative Cryo-EM images of the EVs isolated from human plasma by SEC, showing the presence of EVs (red arrow) and other impurities (white arrow). Scale bar: 100 nm.
