# Supplementary material for: Quantitative single-particle profiling of extracellular vesicles via fluorescent nanoparticle tracking analysis
Source: Royal Society of Chemistry journal article supplement (doi:10.1039/d5sd00119f), 2025-12-03
Supplement: d5sd00119f2.xlsx [file d5sd00119f2.xlsx]

## Sheet: Figure 2
F: Fraction		F1: 4.0-4.7 mL		F2: 4.7-5.4 mL		F3: 5.4-6.1 mL		F4: 6.1-6.8 mL
P: Position		NVS = A number of Particles vs. Sensitivity					NVS Scatter sensitivity: 80				NVS Fluorescence sensitivity: 95
	Figure 2B. Unremoved label (AF488 anti-CD63) F-NTA measured particle concentration (Particles/mL)						Figure 2B. HT29 EVs F-NTA measured particle concentration (Particles/mL)						Figure 2C. Unremoved label (AF488 anti-AopB) F-NTA measured particle concentration (Particles/mL)						Figure 2B. VLDL F-NTA measured particle concentration (Particles/mL)
		F1	F2	F3	F4			F1	F2	F3	F4			F1	F2	F3	F4			F1	F2	F3	F4
	P1	0	0	0	0		P1	8100000	85000000	45000000	13000000		P1	4500000	16000000	11000000	9900000		P1	9000000	77000000	170000000	190000000
	P2	0	0	900000	900000		P2	20000000	90000000	47000000	21000000		P2	7200000	14000000	12000000	11000000		P2	9000000	95000000	220000000	210000000
	P3	0	0	1800000	900000		P3	25000000	100000000	54000000	25000000		P3	8100000	13000000	7200000	9900000		P3	12000000	83000000	270000000	250000000
	P4	0	900000	900000	0		P4	25000000	120000000	47000000			P4	9000000	13000000	9000000	13000000		P4	8100000	68000000	260000000	320000000
	P5	0	0	1800000	0		P5	35000000	130000000	45000000	32000000		P5	8100000	21000000	7200000	13000000		P5	4500000	92000000	260000000	290000000
	P6	0	1800000	1800000	1800000		P6	37000000	120000000	68000000			P6	7200000	27000000	11000000	7200000		P6	13000000	88000000	260000000	340000000
	P7	0	1800000	2700000	0		P7	21000000	68000000	43000000	13000000		P7	8100000	15000000	9900000	12000000		P7	17000000	99000000	200000000	250000000
	P8	0	0	4500000	900000		P8	37000000	120000000	57000000	18000000		P8	9900000	21000000	11000000	13000000		P8	5400000	100000000	270000000	320000000
	P9	1800000	2700000	3600000	1800000		P9	20000000	96000000	56000000	25000000		P9	9000000	26000000	19000000	30000000		P9	11000000	88000000	250000000	300000000
	P10	900000	900000	3600000	1800000		P10	28000000	32000000	57000000	32000000		P10	9000000	26000000	18000000	17000000		P10	14000000	100000000	240000000	260000000
	P11	900000	1800000	3600000	0		P11	29000000	66000000	50000000	25000000		P11	8100000	26000000	13000000	14000000		P11	9900000	90000000	210000000	260000000
								NVS F1	NVS F2	NVS F3	NVS F4									NVS F1	NVS F2	NVS F3	NVS F4
	NVS Factor in HT29						P1	9120600	9.571e+07	5.067e+07	1.4638e+07		NVS Factor in AopB						P1	16164000	138292000	305320000	341240000
	Scatter	143					P2	2.252e+07	1.0134e+08	5.2922e+07	2.3646e+07		Scatter	88					P2	16164000	170620000	395120000	377160000
	Fluorescence	127					P3	2.815e+07	1.126e+08	6.0804e+07	2.815e+07		Fluorescence	49					P3	21552000	149068000	484920000	449000000
	NVS	1.12598					P4	2.815e+07	135120000	5.2922e+07			NVS	1.79592					P4	14547600	122128000	466960000	574720000
							P5	3.941e+07	146380000	5.067e+07	36032000								P5	8082000	165232000	466960000	520840000
		NVS F1	NVS F2	NVS F3	NVS F4		P6	4.1662e+07	135120000	7.6568e+07				NVS F1	NVS F2	NVS F3	NVS F4		P6	23348000	158048000	466960000	610640000
	P1	0	0	0	0		P7	2.3646e+07	7.6568e+07	4.8418e+07	1.4638e+07		P1	8082000	28736000	19756000	17780400		P7	30532000	177804000	359200000	449000000
	P2	0	0	1.0134e+06	1.0134e+06		P8	4.1662e+07	135120000	6.4182e+07	2.0268e+07		P2	12931200	25144000	21552000	19756000		P8	9698400	179600000	484920000	574720000
	P3	0	0	2.0268e+06	1.0134e+06		P9	2.252e+07	1.08096e+08	6.3056e+07	2.815e+07		P3	14547600	23348000	12931200	17780400		P9	19756000	158048000	449000000	538800000
	P4	0	1.0134e+06	1.0134e+06	0		P10	3.1528e+07	36032000	6.4182e+07	36032000		P4	16164000	23348000	16164000	23348000		P10	25144000	179600000	431040000	466960000
	P5	0	0	2.0268e+06	0		P11	3.2654e+07	74316000	5.63e+07	2.815e+07		P5	14547600	37716000	12931200	23348000		P11	17780400	161640000	377160000	466960000
	P6	0	2.0268e+06	2.0268e+06	2.0268e+06								P6	12931200	48492000	19756000	12931200
	P7	0	2.0268e+06	3.0402e+06	0								P7	14547600	26940000	17780400	21552000
	P8	0	0	5.067e+06	1.0134e+06								P8	17780400	37716000	19756000	23348000
	P9	2.0268e+06	3.0402e+06	4.0536e+06	2.0268e+06								P9	16164000	46696000	34124000	53880000
	P10	1.0134e+06	1.0134e+06	4.0536e+06	2.0268e+06								P10	16164000	46696000	32328000	30532000
	P11	1.0134e+06	2.0268e+06	4.0536e+06	0								P11	14547600	46696000	23348000	25144000

## Sheet: Figure 3
F: Fraction		F1: 4.0-4.7 mL		F2: 4.7-5.4 mL		F3: 5.4-6.1 mL		F4: 6.1-6.8 mL
P: Position		NVS = A number of Particles vs. Sensitivity					NVS Scatter sensitivity: 80				NVS Fluorescence sensitivity: 95
	Figure 3A: Strep-labelled liposomes Scatter measured particle concentration (Particles/mL)						Figure 3A: Strep labelled liposomes F-NTA measured particle concentration (Particles/mL)						Figure 3C: CD63 labelled HT29 EVs Scatter measured particle concentration (Particles/mL)						Figure 3C. CD63 labelled HT29 EVs F-NTA measured particle concentration (Particles/mL)
		F1	F2	F3	F4			F1	F2	F3	F4			F1	F2	F3	F4			F1	F2	F3	F4
	P1		48000000	25000000	12000000		P1	20000000	44000000	13000000	3600000		P1	360000000	610000000	690000000	180000000		P1	8100000	85000000	45000000	13000000
	P2	30000000	50000000	25000000	13000000		P2	16000000	44000000	19000000	4500000		P2	410000000	590000000	740000000	160000000		P2	20000000	90000000	47000000	21000000
	P3	25000000	54000000	26000000			P3	19000000	48000000	21000000	7200000		P3	370000000	500000000	620000000	160000000		P3	25000000	100000000	54000000	25000000
	P4		50000000	30000000	9900000		P4	15000000	39000000	13000000	7200000		P4	380000000	600000000	660000000	170000000		P4	25000000	120000000	47000000
	P5	29000000	63000000	28000000	14000000		P5	9900000	40000000	23000000			P5	350000000	520000000	670000000	170000000		P5	35000000	130000000	45000000	32000000
	P6	30000000	61000000	30000000			P6	21000000	51000000	25000000			P6	390000000	600000000	690000000	160000000		P6	37000000	120000000	68000000
	P7	24000000	60000000	35000000	14000000		P7	17000000	41000000	27000000	5400000		P7		480000000				P7	21000000	68000000	43000000	13000000
	P8	30000000	63000000	29000000	15000000		P8	13000000	28000000	13000000	3600000		P8	390000000	660000000	710000000	160000000		P8	37000000	120000000	57000000	18000000
	P9	30000000	69000000	27000000	15000000		P9	25000000	52000000	22000000	5400000		P9	260000000	490000000	980000000	170000000		P9	20000000	96000000	56000000	25000000
	P10	37000000	59000000	30000000	15000000		P10	18000000	41000000	24000000			P10	28000000	370000000	690000000	230000000		P10	28000000	32000000	57000000	32000000
	P11	54000000	66000000	47000000	39000000		P11	13000000	36000000	13000000	6300000		P11	260000000	320000000	630000000	410000000		P11	29000000	66000000	50000000	25000000
								NVS F1	NVS F2	NVS F3	NVS F4									NVS F1	NVS F2	NVS F3	NVS F4
	NVS Factor in Strep labelled liposomes						P1	2.038e+07	4.4836e+07	1.3247e+07	3.6684e+06		NVS Factor in CD63 labelled HT29 EVs						P1	9120600	9.571e+07	5.067e+07	1.4638e+07
	Scatter	160					P2	1.6304e+07	4.4836e+07	19361000	4585500		Scatter	143					P2	2.252e+07	1.0134e+08	5.2922e+07	2.3646e+07
	Fluorescence	157					P3	19361000	4.8912e+07	2.1399e+07	7.3368e+06		Fluorescence	127					P3	2.815e+07	1.126e+08	6.0804e+07	2.815e+07
	NVS	1.01911					P4	1.5285e+07	39741000	1.3247e+07	7.3368e+06		NVS	1.12598					P4	2.815e+07	135120000	5.2922e+07
							P5	1.00881e+07	4.076e+07	2.3437e+07									P5	3.941e+07	146380000	5.067e+07	36032000
							P6	2.1399e+07	5.1969e+07	2.5475e+07									P6	4.1662e+07	135120000	7.6568e+07
							P7	17323000	4.1779e+07	2.7513e+07	5.5026e+06								P7	2.3646e+07	7.6568e+07	4.8418e+07	1.4638e+07
							P8	1.3247e+07	2.8532e+07	1.3247e+07	3.6684e+06								P8	4.1662e+07	135120000	6.4182e+07	2.0268e+07
							P9	2.5475e+07	5.2988e+07	2.2418e+07	5.5026e+06								P9	2.252e+07	1.08096e+08	6.3056e+07	2.815e+07
							P10	18342000	4.1779e+07	2.4456e+07									P10	3.1528e+07	36032000	6.4182e+07	36032000
							P11	1.3247e+07	36684000	1.3247e+07	6.4197e+06								P11	3.2654e+07	74316000	5.63e+07	2.815e+07
	Figure 3B: Median Size of Strep labelled liposome in each Position (nm)												Figure 3D: Median Size of CD63 labelled HT29 EVs in each Position (nm)
		Scatter				488 nm								Scatter				488 nm
		F1	F2	F3	F4	F1	F2	F3	F4					F1	F2	F3	F4	F1	F2	F3	F4
	P1	123.8	111.4	113.3	113.3	105	121	95	50				P1	125	135	112.9	108.3	150	120	112.5	140
	P2	109.2	113.8	96.2	96.2	102.5	112	87.5	90				P2	123.8	127.7	115.6	103.8	180	135	170	85
	P3	116.7	120	117.1	117.1	120	107	115	101.7				P3	121.5	127.3	114.3	103.5	135	145	140	226.7
	P4	116.7	124.2	117.9	117.9	93.3	110	92.5	85				P4	116.2	125.5	119.1	108.5	150	135	112.5
	P5	125	109.4	111.7	111.7	125	111.7	130	122.5				P5	120.6	122.9	109.3	107.1	125	132.1	167.5	155
	P6	116.4	112.5	113	113	117.5	120	100	57.5				P6	121.2	123.8	105	106	130	118.3	122.5
	P7	120	124.2	115	115	130	127.5	90	150				P7	55	123.4	78.3	95	137.5	122.5	107.5
	P8	115	114	116.4	116.4	105	110	90	150				P8	126.7	122	107.6	95.5	140	125	122.5	90
	P9	112	133	103.8	103.8	115	112	123	140				P9	128.6	129	129	106.3	150	131	105	80
	P10	111	113.8	113.8	113.8	125	112.5	117.5	75				P10	132.5	129.5	106.8	114.2	132.5	130	140	105
	P11	92.5	117.5	126.2	126.2	145	128.3	85	65				P11	111.7	126.9	126.9	108	167.5	150	109	125

## Sheet: Figure 4
M: Measurement		NVS Scatter sensitivity: 80				NVS Fluorescence sensitivity: 95
P: Position		NVS = A number of Particles vs. Sensitivity
	Figure 4A: HEK293 EVs F-NTA measured particle concentration (Particles/mL)					Figure 4A: HEK293 EVs Scatter particle concentration (Particles/mL)					Figure 4A: HT29 EVs F-NTA measured particle concentration (Particles/mL)					Figure 4A: HT29 EVs Scatter particle concentration (Particles/mL)					Figure 4B: HEK293 Fluorescence particle%					Figure 4B: HT29 Fluorescence particle%
		M1	M2	M3			M1	M2	M3			M1	M2	M3			M1	M2	M3			M1	M2	M3			M1	M2	M3
	P1		12000000	11000000		P1	130000000	130000000	130000000		P1	130000000	87000000	91000000		P1	340000000	330000000	320000000		P1	NA	0.184615	0.169231		P1	0.659559	0.454773	0.490547
	P2	17000000	15000000	9900000		P2	130000000	130000000	150000000		P2	120000000	110000000	120000000		P2	330000000	310000000	320000000		P2	0.261538	0.230769	0.132		P2	0.627273	0.612097	0.646875
	P3		18000000	12000000		P3	110000000	110000000	130000000		P3	99000000	110000000	120000000		P3	230000000	250000000	240000000		P3	NA	0.327273	0.184615		P3	0.7425	0.759	0.8625
	P4	16000000				P4	110000000	140000000	130000000		P4	120000000	99000000	120000000		P4	250000000	290000000	270000000		P4	0.290909	NA	NA		P4	0.828	0.588879	0.766667
	P5	13000000	16000000	11000000		P5	110000000	110000000	130000000		P5	90000000	120000000	130000000		P5	290000000	270000000	230000000		P5	0.236364	0.290909	0.169231		P5	0.535345	0.766667	0.975
	P6	9900000		11000000		P6	110000000	120000000	130000000		P6	42000000	110000000	120000000		P6	290000000	290000000	260000000		P6	0.18	NA	0.169231		P6	0.249828	0.65431	0.796154
	P7	13000000	13000000	13000000		P7	130000000	120000000	110000000		P7	89000000	100000000	110000000		P7	310000000	310000000	250000000		P7	0.2	0.216667	0.236364		P7	0.495242	0.556452	0.759
	P8		14000000	13000000		P8	140000000		160000000		P8	110000000	110000000	150000000		P8	270000000	280000000	290000000		P8	NA	NA	0.1625		P8	0.702778	0.677679	0.892241
	P9	16000000	21000000			P9		170000000	150000000		P9	100000000	110000000	140000000		P9	330000000	360000000	320000000		P9	NA	0.247059	NA		P9	0.522727	0.527083	0.754687
	P10	15000000		11000000		P10					P10	110000000	95000000	120000000		P10	390000000	390000000	430000000		P10	NA	NA	NA		P10	0.486538	0.420192	0.481395
	P11	14000000	12000000	6300000		P11	340000000	360000000	360000000		P11	67000000	75000000	100000000		P11	400000000	400000000	410000000		P11	0.0823529	0.0666667	0.035		P11	0.288938	0.323437	0.420732
		NVS M1	NVS M2	NVS M3								NVS M1	NVS M2	NVS M3
	P1		24000000	22000000		NVS Factor in HEK293					P1	224250000	150075000	156975000		NVS Factor in HT29
	P2	34000000	30000000	19800000		Scatter	164				P2	207000000	189750000	207000000		Scatter	207
	P3		36000000	24000000		Fluorescence	82				P3	170775000	189750000	207000000		Fluorescence	120
	P4	32000000				NVS	2				P4	207000000	170775000	207000000		NVS	1.725
	P5	26000000	32000000	22000000							P5	155250000	207000000	224250000
	P6	19800000		22000000							P6	72450000	189750000	207000000
	P7	26000000	26000000	26000000							P7	153525000	172500000	189750000
	P8		28000000	26000000							P8	189750000	189750000	258750000
	P9	32000000	42000000								P9	172500000	189750000	241500000
	P10	30000000		22000000							P10	189750000	163875000	207000000
	P11	28000000	24000000	12600000							P11	115575000	129375000	172500000
	Figure 4C: HT29 EVs Particle Size Distribution								Figure 4D: HEK293 EVs Particle Size Distribution
	Size / nm	Scatter			488 nm				Size / nm	Scatter			488 nm
	5	0	70120	0	0	0	80280		5	0	0	0	0	0	0
	15	148900	210300	591700	0	0	0		15	69200	72660	197100	0	0	0
	25	223400	490800	591700	142100	73320	80280		25	346000	72660	0	0	0	0
	35	744700	771300	739600	355200	146600	642200		35	138400	363300	131400	242900	225600	479800
	45	1936000	1262000	1553000	639400	586600	963400		45	0	290600	262700	971500	676700	575700
	55	1713000	2384000	2663000	994700	2200000	2007000		55	761200	726600	394100	485700	676700	479800
	65	4617000	5469000	5029000	1563000	2786000	2007000		65	830400	1090000	1051000	850100	676700	575700
	75	7447000	8274000	8727000	3197000	2493000	4335000		75	2007000	2834000	2365000	485700	338400	863600
	85	11620000	12270000	12720000	2771000	3373000	4415000		85	3391000	4287000	5452000	728600	563900	671700
	95	15120000	15570000	14720000	4405000	4106000	4977000		95	4636000	5522000	6634000	607200	451100	287900
	105	17650000	18510000	15010000	4334000	4106000	4897000		105	6850000	6830000	7751000	485700	563900	191900
	115	15490000	15290000	14640000	3908000	5792000	4014000		115	9549000	8210000	8013000	485700	338400	95960
	125	13930000	15220000	13900000	4192000	3593000	5459000		125	8165000	8646000	8473000	121400	563900	191900
	135	11620000	12130000	13170000	3695000	3446000	4255000		135	6850000	8138000	6897000	364300	338400	0
	145	11990000	9606000	10130000	2416000	2860000	3773000		145	5190000	6176000	5846000	0	451100	191900
	155	8564000	8554000	8210000	3055000	2346000	2248000		155	5397000	5086000	5058000	364300	563900	191900
	165	7522000	7993000	6361000	2558000	2566000	2168000		165	4083000	3488000	3744000	0	0	0
	175	5511000	4628000	5547000	1776000	1320000	1846000		175	2768000	2034000	2890000	121400	112800	0
	185	2904000	4417000	4068000	1847000	1320000	1766000		185	2560000	2761000	2562000	0	338400	0
	195	2607000	4137000	4216000	994700	733200	1606000		195	1453000	2034000	1708000	121400	112800	95960
	205	2160000	2454000	2071000	781500	439900	1044000		205	1176000	1889000	1576000	121400	0	95960
	215	1564000	1543000	1331000	923600	1320000	883100		215	1176000	1453000	1642000	121400	112800	0
	225	1787000	1402000	1183000	994700	879900	802800		225	1176000	944600	1182000	0	0	0
	235	1564000	1332000	1183000	568400	806500	802800		235	553600	944600	722500	121400	112800	95960
	245	670300	701200	739600	355200	659900	562000		245	761200	363300	394100	0	0	0
	255	595800	490800	295800	284200	513300	562000		255	553600	508600	591200	0	0	95960
	265	819200	841400	517700	426300	366600	802800		265	276800	726600	525500	0	0	0
	275	148900	420700	369800	213100	220000	321100		275	138400	72660	459800	121400	0	95960
	285	372400	280500	443800	568400	220000	401400		285	553600	290600	394100	121400	0	0
	295	223400	70120	147900	213100	146600	642200		295	276800	145300	328400	0	0	95960
	305	148900	140200	147900	142100	366600	160600		305	276800	363300	65680	0	0	0
	315	74470	210300	0	71050	73320	321100		315	69200	145300	131400	0	0	0
	325	297900	70120	147900	213100	73320	160600		325	138400	363300	197100	0	0	0
	335	74470	70120	0	0	146600	240800		335	207600	72660	65680	0	0	0
	345	74470	0	0	142100	220000	0		345	69200	72660	131400	0	112800	0
	355	148900	210300	0	0	146600	80280		355	69200	72660	0	121400	0	0
	365	74470	70120	0	71050	146600	160600		365	138400	72660	65680	0	0	0
	375	74470	140200	0	0	0	0		375	69200	0	0	0	0	0
	385	0	0	73960	0	0	0		385	0	0	0	0	0	0
	395	0	70120	73960	142100	73320	80280		395	0	72660	0	0	0	0
	405	0	70120	73960	142100	0	240800		405	138400	72660	0	0	0	0
	415	74470	0	0	71050	0	0		415	0	72660	131400	0	0	0
	425	0	140200	0	71050	73320	0		425	69200	0	0	0	0	0
	435	0	0	0	0	0	80280		435	0	0	0	0	0	0
	445	0	70120	0	71050	73320	0		445	0	72660	0	0	0	0
	455	0	0	0	0	0	0		455	0	0	0	0	0	0
	465	0	0	73960	0	0	80280		465	0	145300	0	0	0	0
	475	0	0	0	0	0	0		475	69200	0	0	0	0	0
	485	0	0	0	0	0	0		485	0	0	0	0	0	0
	495	0	0	0	0	0	0		495	69200	0	0	0	0	0
	505	0	0	0	0	0	0		505	0	0	0	0	0	0
	515	74470	0	0	0	0	0		515	0	0	65680	0	112800	0
	525	0	0	0	0	0	0		525	0	0	0	0	0	0
	535	0	0	0	0	0	0		535	0	0	0	0	0	0
	545	0	0	0	0	0	0		545	0	0	0	0	0	0
	555	74470	0	0	0	0	0		555	0	0	0	0	0	0
	565	0	0	0	0	0	0		565	0	0	0	0	0	0
	575	0	0	0	0	0	0		575	0	0	0	0	0	0
	585	0	0	0	0	0	0		585	0	0	0	0	0	0
	595	0	0	0	0	0	0		595	0	0	0	0	0	0

## Sheet: Figure 5
M: Measurement		488 nm		647 nm
P: Position		NVS = A number of Particles vs. Sensitivity					NVS Scatter sensitivity: 80				NVS Fluorescence sensitivity: 95
	Figure 5A: Concentration distribution of EVs and NVEPs (Particles/mL)								NVS Factor in 488 nm (Lipoproteins) channel			NVS Factor in 647 nm (EVs) channel			Figure 5C: F-NTA 488 nm (Lipoproteins) channel particle concentration (Particles/mL)					Figure 5C: F-NTA 647 nm (EVs) particle concentration (Particles/mL)
	Size / nm	488 nm (Lipoproteins)			647 nm (EVs)				Scatter	142		Scatter	109			M1	M2	M3			M1	M2	M3
	5	0	0	0	0	0	0		Fluorescence	125		Fluorescence	117		P1		320000000			P1	27000000	18000000
	15	147907	154610	153814	0	0	0		NVS	1.136		NVS	0.931624		P2	570000000	600000000	530000000		P2	36000000	36000000	31000000
	25	1626752	1700592	1691504	0	0	0								P3	700000000	660000000	580000000		P3	36000000	45000000	45000000
	35	3401184	3555680	3537504	535218	580495	522827								P4	800000000	760000000	760000000		P4	58000000	49000000	67000000
	45	6211648	6492240	6460432	535218	580495	522827								P5	750000000	770000000	700000000		P5	63000000	36000000	58000000
	55	7690720	8037200	7998576	401437	435348	392120								P6	330000000	760000000	770000000		P6	99000000	54000000	85000000
	65	6951184	7264720	7229504	669092	725642	653534		Figure 5C: EV to Lipoprotein %						P7	810000000	860000000	810000000		P7	72000000	85000000	63000000
	75	5472112	5718624	5691360	401437	435348	392120			M1	M2	M3			P8	710000000	760000000	930000000		P8	67000000	72000000	90000000
	85	4140720	4328160	4306576	267656	290294	261414		P1		0.0461301				P9	720000000	790000000	880000000		P9	67000000	72000000	45000000
	95	3697680	3864672	3845360	133781	145147	130707		P2	0.0517953	0.0492055	0.0479676			P10	800000000	710000000	760000000		P10	81000000	72000000	72000000
	105	3105824	3245552	3229648	535218	580495	522827		P3	0.0421761	0.0559153	0.0636278			P11	690000000	670000000	750000000		P11	85000000	94000000	81000000
	115	1922112	2009584	1999360	267656	290294	261414		P4	0.0594566	0.0528743	0.0722975				NVS M1	NVS M2	NVS M3			NVS M1	NVS M2	NVS M3
	125	1035237	1082040	1076701	401437	435348	392120		P5	0.0688877	0.0383419	0.0679504			P1		3.6352e+08			P1	25153848	16769232
	135	1922112	2009584	1999360	267656	290294	261414		P6	0.246027	0.0582697	0.0905296			P2	647520000	6.816e+08	602080000		P2	33538464	33538464	28880344
	145	2070928	2164080	2153856	0	0	0		P7	0.072897	0.0810556	0.0637849			P3	7.952e+08	7.4976e+08	658880000		P3	33538464	41923080	41923080
	155	1479072	1546096	1538144	133781	145147	130707		P8	0.0773889	0.0776929	0.0793637			P4	9.088e+08	8.6336e+08	8.6336e+08		P4	54034192	45649576	62418808
	165	887330	927430	922886	133781	145147	130707		P9	0.0763141	0.0747425	0.0419365			P5	8.52e+08	8.7472e+08	7.952e+08		P5	58692312	33538464	54034192
	175	2070928	2164080	2153856	133781	145147	130707		P10	0.0830343	0.0831642	0.0776929			P6	3.7488e+08	8.6336e+08	8.7472e+08		P6	92230776	50307696	79188040
	185	1331392	1391600	1384784	0	0	0		P11	0.101026	0.115058	0.0885699			P7	9.2016e+08	9.7696e+08	9.2016e+08		P7	67076928	79188040	58692312
	195	2070928	2164080	2153856	133781	145147	130707								P8	8.0656e+08	8.6336e+08	1.05648e+09		P8	62418808	67076928	83846160
	205	887330	927430	922886	133781	145147	130707								P9	8.1792e+08	8.9744e+08	9.9968e+08		P9	62418808	67076928	41923080
	215	1183712	1237104	1230288	0	0	0								P10	9.088e+08	8.0656e+08	8.6336e+08		P10	75461544	67076928	67076928
	225	739422	772821	769072	133781	145147	130707								P11	7.8384e+08	7.6112e+08	8.52e+08		P11	79188040	87572656	75461544
	235	1183712	1237104	1230288	0	0	0
	245	1479072	1546096	1538144	267656	290294	261414
	255	887330	927430	922886	133781	145147	130707
	265	1331392	1391600	1384784	0	0	0
	275	443722	463715	461443	133781	145147	130707
	285	591629	618325	615258	133781	145147	130707
	295	739422	772821	769072	0	0	0
	305	1183712	1237104	1230288	267656	290294	261414
	315	295814	309106	307629	133781	145147	130707
	325	739422	772821	769072	267656	290294	261414
	335	0	0	0	0	0	0
	345	739422	772821	769072	0	0	0
	355	443722	463715	461443	133781	145147	130707
	365	443722	463715	461443	0	0	0
	375	739422	772821	769072	267656	290294	261414
	385	739422	772821	769072	0	0	0
	395	591629	618325	615258	0	0	0
	405	295814	309106	307629	133781	145147	130707
	415	443722	463715	461443	0	0	0
	425	147907	154610	153814	0	0	0
	435	591629	618325	615258	0	0	0
	445	295814	309106	307629	133781	145147	130707
	455	147907	154610	153814	0	0	0
	465	443722	463715	461443	0	0	0
	475	147907	154610	153814	133781	145147	130707
	485	0	0	0	0	0	0
	495	295814	309106	307629	0	0	0
	505	0	0	0	0	0	0
	515	147907	154610	153814	0	0	0
	525	0	0	0	0	0	0
	535	147907	154610	153814	0	0	0
	545	0	0	0	0	0	0
	555	147907	154610	153814	0	0	0
	565	0	0	0	0	0	0
	575	295814	309106	307629	0	0	0
	585	0	0	0	0	0	0
	595	147907	154610	153814	0	0	0
